# Supplementary material
Source: Springer Nature journal article supplement (https://www.springermedizin.de/resource/supplementary/12907_2010_81_MOESM2_ESM.pdf/9524620)

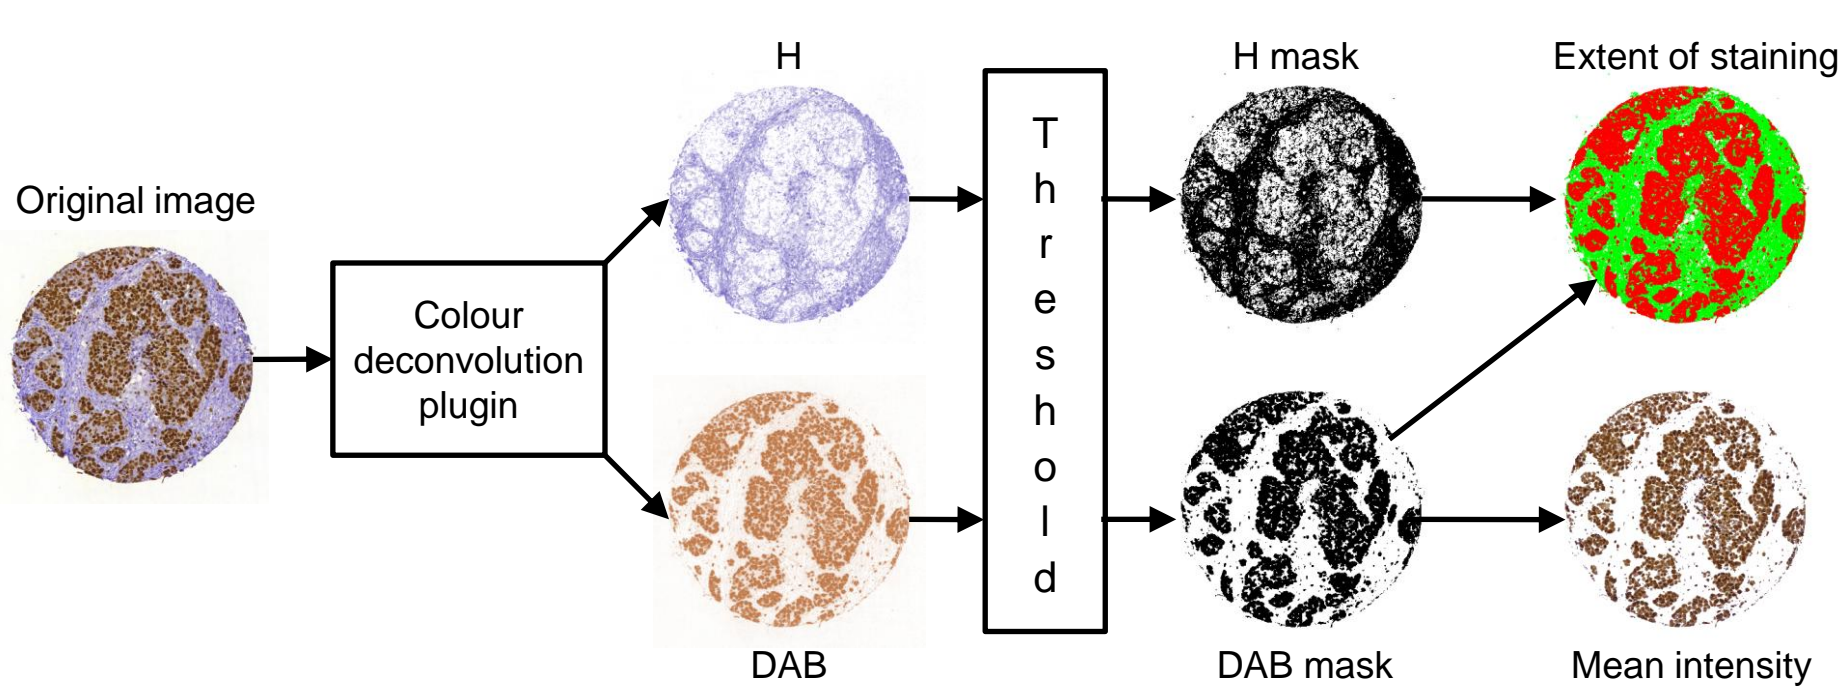

Supplement: MOESM2 [file 9524620]
